# Supplementary material
Source: PubMed Central journal article supplement (PMC522007)

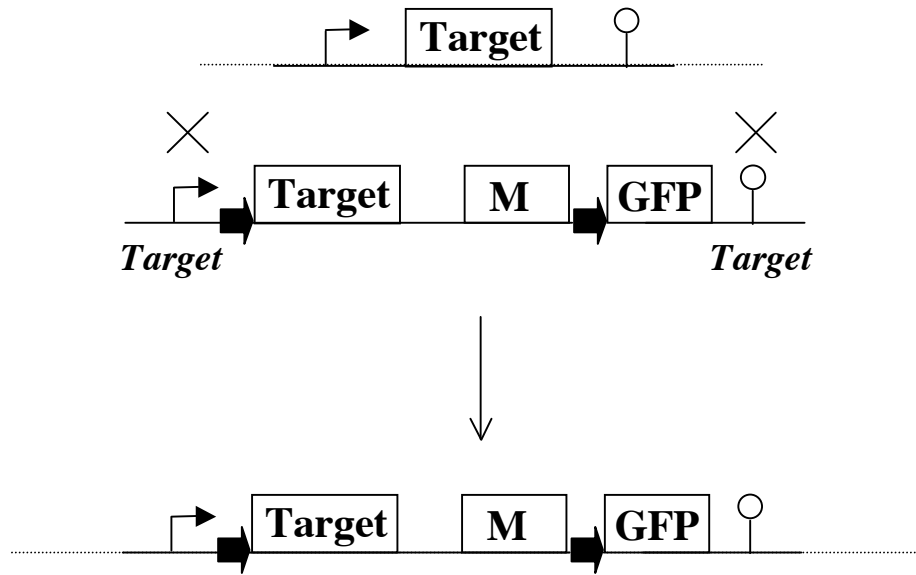

Supplement: pnas_101_41_14931__2.pdf [file pnas_101_41_14931__2.pdf]
